# Supplementary material for: Influence of DEFB4 copy number variants on gene expression in monocytes
Source: Research Square preprint supplement (doi:10.21203/rs.3.rs-6912196/v1), 2025-07-14
Supplement: Supplementary file 1 [file fd3e70dccef08754ccc9b76f.xlsx]

## Sheet: Sheet1
Sample	PRT run	PRT CN	likelihood	ddPCR run 1	ddPCR run 2	ddPCR CN
DEFB0018	2.11802	2	0.99	1.9	1.98	2
DEFB0027	4.79765	5	1	4.85	4.95	5
DEFB0037	3.86896	4	1	3.9	4	4
DEFB0058	4.80617	5	1	4.99	4.99	5
DEFB0064	4.93698	5	1	4.94	4.9	5
DEFB0068	3.01811	3	1	3.79	3.92	4
DEFB0075	3.96273	4	1	3.94	3.95	4
DEFB0080	3.8221	4	0.99	3.96	3.81	4
DEFB0082	7.12019	7	1	6.82	7.08	7
DEFB0088	2.00339	2	1	2.03	2.02	2
DEFB0089	2.00825	2	1	1.98	1.98	2
DEFB0099	4.98629	5	1	4.77	4.88	5
DEFB0100	7.15882	7	0.99	6.83	7.04	7
DEFB0104	6.98925	7	1	6.86	7.05	7
DEFB0112	7.07006	7	1	7.13	6.89	7
DEFB0123	2.02931	2	1	1.93	1.94	2
DEFB0131	3.87708	4	0.99	3.99	3.9	4
DEFB0142	3.04533	3	1	2.83	3	3
DEFB0153	4.97871	5	0.99	4.96	4.86	5
DEFB0155	5.04329	5	0.94	4.98	4.89	5
DEFB0159	4.97182	5	1	4.97	5.07	5
DEFB0162	3.01304	3	1	3	2.89	3
DEFB0163	3.81123	4	0.98	3.81	3.89	4
DEFB0166	5.90365	6	1	6	5.92	6
DEFB0168	2.9682	3	1	3.1	2.89	3
DEFB0178	4.05293	4	1	3.95	3.94	4
DEFB0197	3.02537	3	1	4.07	3.98	4
DEFB0213	4.96312	5	1	4.89	4.89	5
DEFB0218	4.93383	5	1	5.11	4.97	5
DEFB0227	1.98276	2	1	2.86	3.1	3
DEFB0229	3.02193	3	1	3.97	4.08	4
DEFB0233	5.73121	6	0.97	5.85	6.01	6
DEFB0241	4.90615	5	1	4.99	4.96	5
DEFB0244	3.05362	3	1	2.97	2.92	3
DEFB0261	5.86448	6	1	5.83	6.01	6
DEFB0298	4.22956	4	0.96	4.01	3.97	4
DEFB0300	2.00543	2	1	2	1.96	2
DEFB0319	4.95919	5	1	4.91	4.99	5
DEFB0329	4.00384	4	0.99	4.89	4.97	5
DEFB0339	2.99045	3	1	2.98	2.99	3
DEFB0358	1.99716	2	1	2.89	2.97	3
DEFB0361	2.92551	3	1	3.01	2.97	3
DEFB0373	6.02562	6	0.99	5.91	5.83	6
DEFB0388	6.94028	7	1	7.02	7.06	7
DEFB0411	4.8149	5	1	4.87	4.92	5
DEFB0423	3.014	3	1	3.08	3.04	3
DEFB0444	7.07465	7	1	7.09	6.82	7
DEFB0447	7.86314	8	1	8.76	9.17	9
DEFB0454	1.98888	2	1	2.97	2.92	3
DEFB0468	7.98942	8	1	8.06	8.14	8
DEFB0485	6.0619	6	0.99	5.88	5.96	6
DEFB0498	7.12484	7	0.93	6.87	7.25	7
DEFB0499	1.94402	2	0.99	2	1.93	2
DEFB0517	7.88065	8	1	7.76	7.9	8
DEFB0537	4.0912	4	1	4.02	4.03	4
DEFB0545	5.77119	6	1	6.16	5.83	6
DEFB0618	3.94255	4	1	3.8	3.95	4
DEFB0630	2.96793	3	1	2.87	3.02	3
DEFB0673	7.09416	7	1	6.91	6.92	7
DEFB0698	6.699	7	0.99	6.95	6.86	7
DEFB0795	4.92504	5	0.99	5.1	4.88	5
DEFB0799	3.0869	3	1	2.93	3.14	3
DEFB0807	1.98004	2	0.99	1.99	1.98	2
DEFB0814	3.91058	4	1	4.87	4.87	5
DEFB0847	2.93833	3	1	2.92	3.01	3
DEFB0850	2.07492	2	0.99	2.02	2.02	2
